# Supplementary material for: Distinct epigenetic landscapes underlie the pathobiology of pancreatic cancer subtypes
Source: PubMed Central journal article supplement (PMC5958058; doi:10.1038/s41467-018-04383-6), 2018-05-17
Supplement: 41467_2018_4383_MOESM1_ESM.pdf [file 41467_2018_4383_MOESM1_ESM.pdf]

## **SUPPLEMENTARY INFORMATION**

**Distinct Epigenetic Landscapes Underlie the Pathobiology of Pancreatic Cancer Subtypes**

**Lomberk, *et al***

**Supplementary Information Contains:**

**Supplementary Figures 1-9**

**Supplementary Tables 1-4**

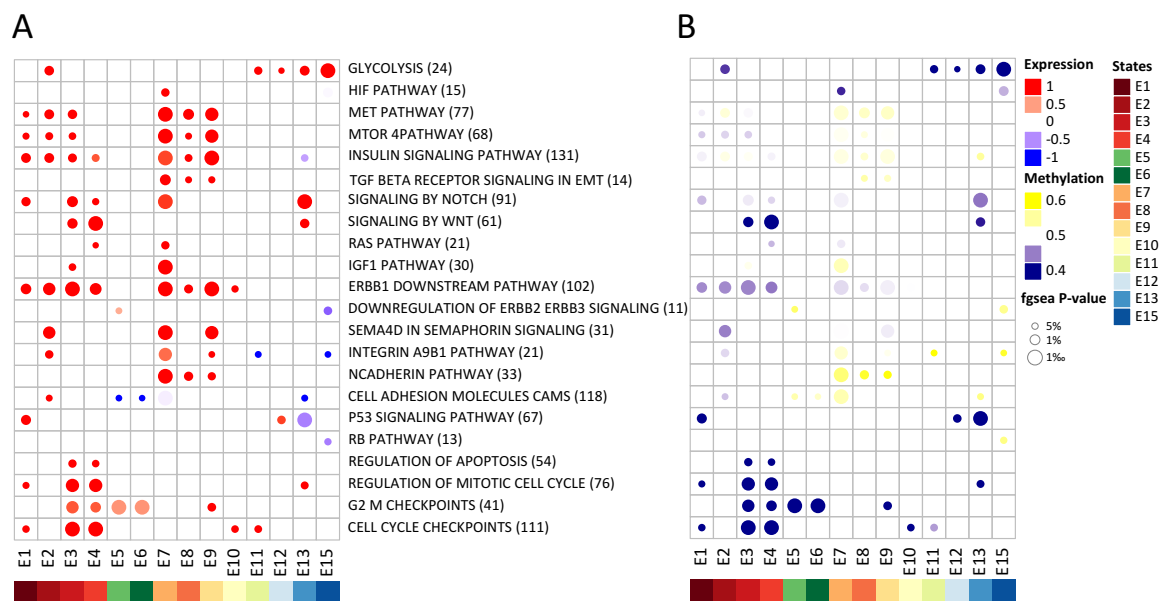

### Supplementary Figure 1. Chromatin state enriched pathways

GSEA enriched pathways for each chromatin state. Circle size is proportional to  $-\log_{10}$  p-value (showing only p-value < 5%) and colors correspond in: (A) to the mean normalized expression of the leading-edge genes and (B) to the mean methylation level of the leading-edge genes.

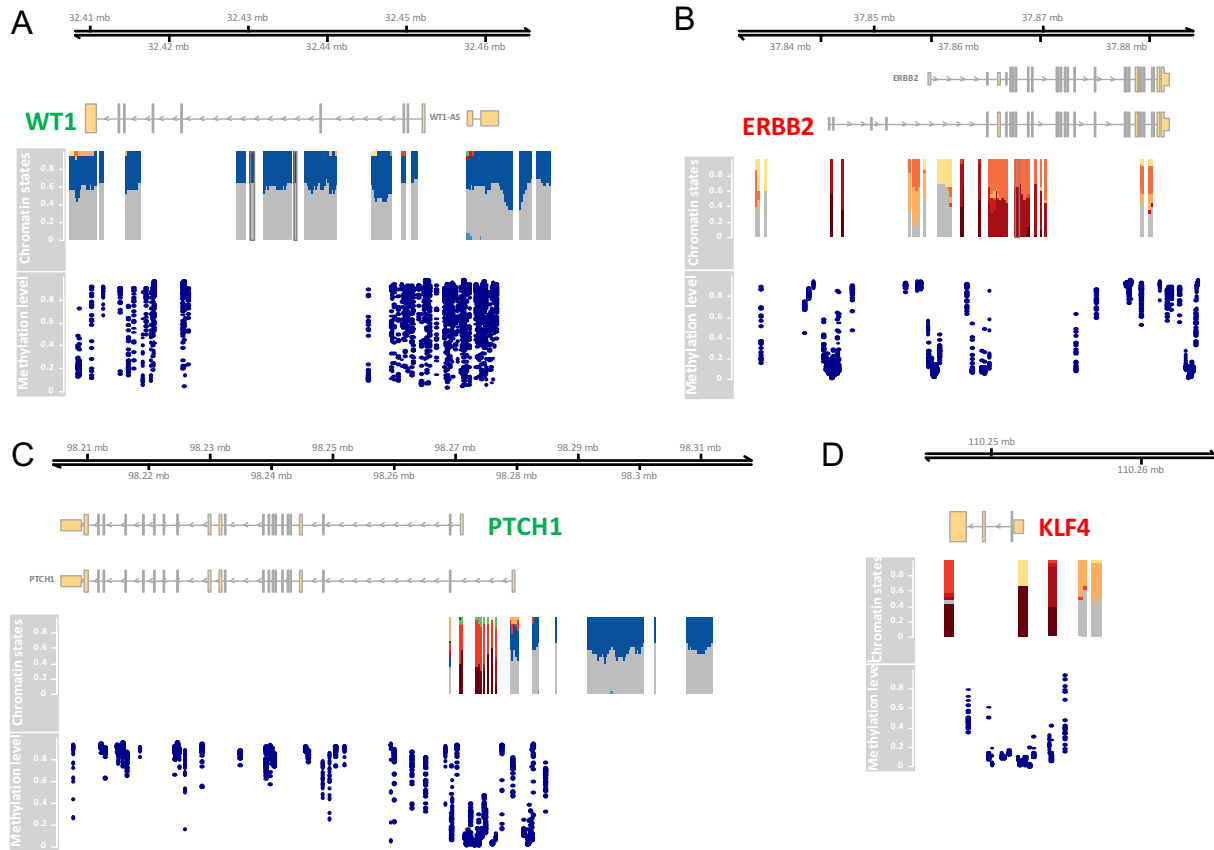

### Supplementary Figure 2. Chromatin states at particular gene loci

Visualization of chromatin state proportions for all samples and methylation levels across the (A) SOX9, (B) ERBB2, (C) PTCH1 and (D) KLF4 loci.



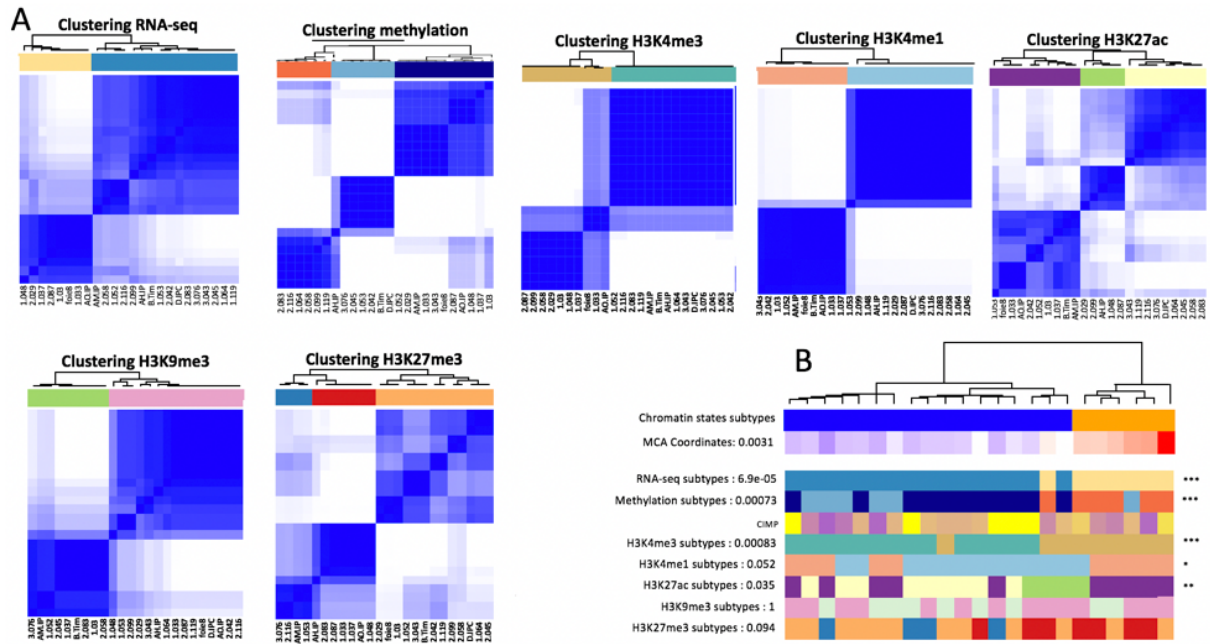

### Supplementary Figure 4. Consensus clustering

**A.** Co-classification matrix resulting from consensus clustering analysis based on Histone marks, mRNA and methylation data. The strength of the blue color is proportional to the frequency at which samples have been clustered together. **B.** Comparison of the clustering with the chromatin state-based clustering (Fisher tests).

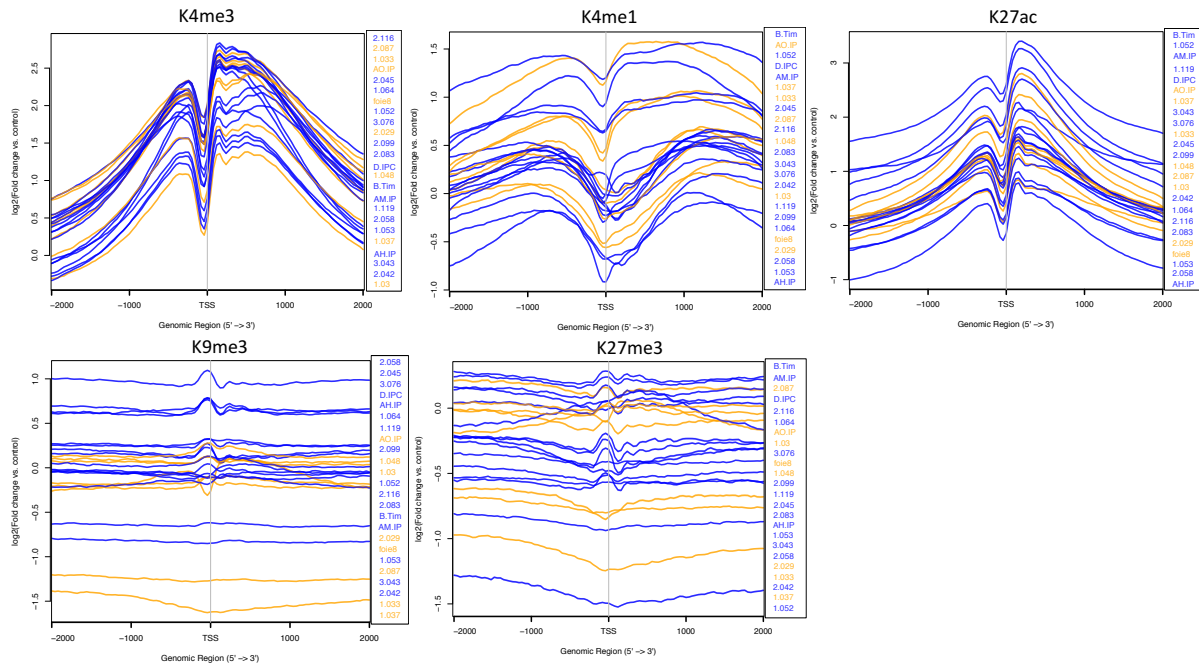

**Supplementary Figure 5. Normalized read density across the TSS regions (+/-2000bp) for each histone modification in all PDAC samples.** Basal tumors are plotted in orange and classical tumors in blue, demonstrating no distinct patterns in average profiles of these histone modifications for the two subtypes.

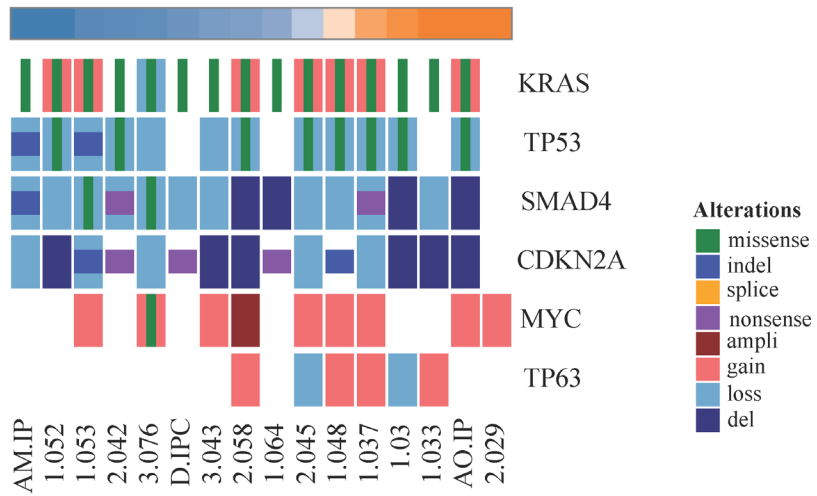

**Supplementary Figure 6. Most frequent genomic alterations, including point mutations and copy number aberrations.** The bar at the top indicates classical (blue) and basal (orange) tumors, which demonstrates that genomic alterations do not distinguish tumor subtypes.

**A** : Percentage of ChromHMM chromatin states for each cluster

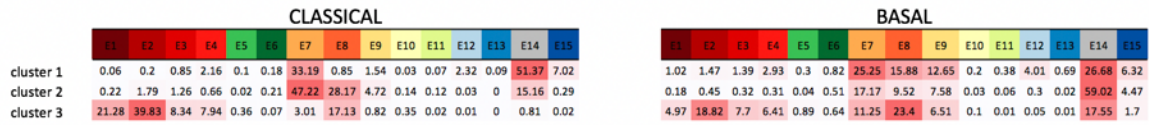

**B**: Number of regions adjusted for Chromosome size for each cluster per chromosome

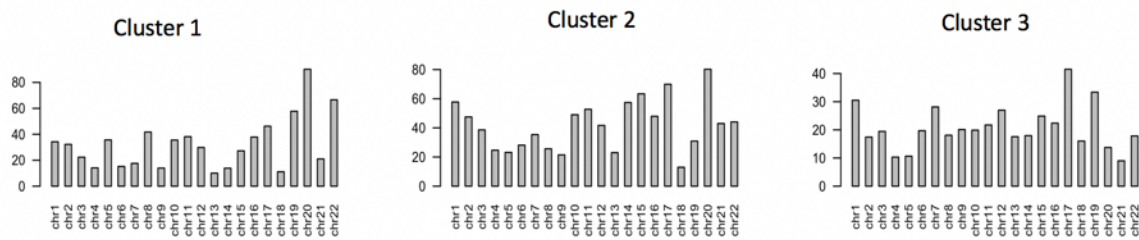

**Supplementary Figure 7. Chromatin states clustering analysis and adjustment for chromosome size**



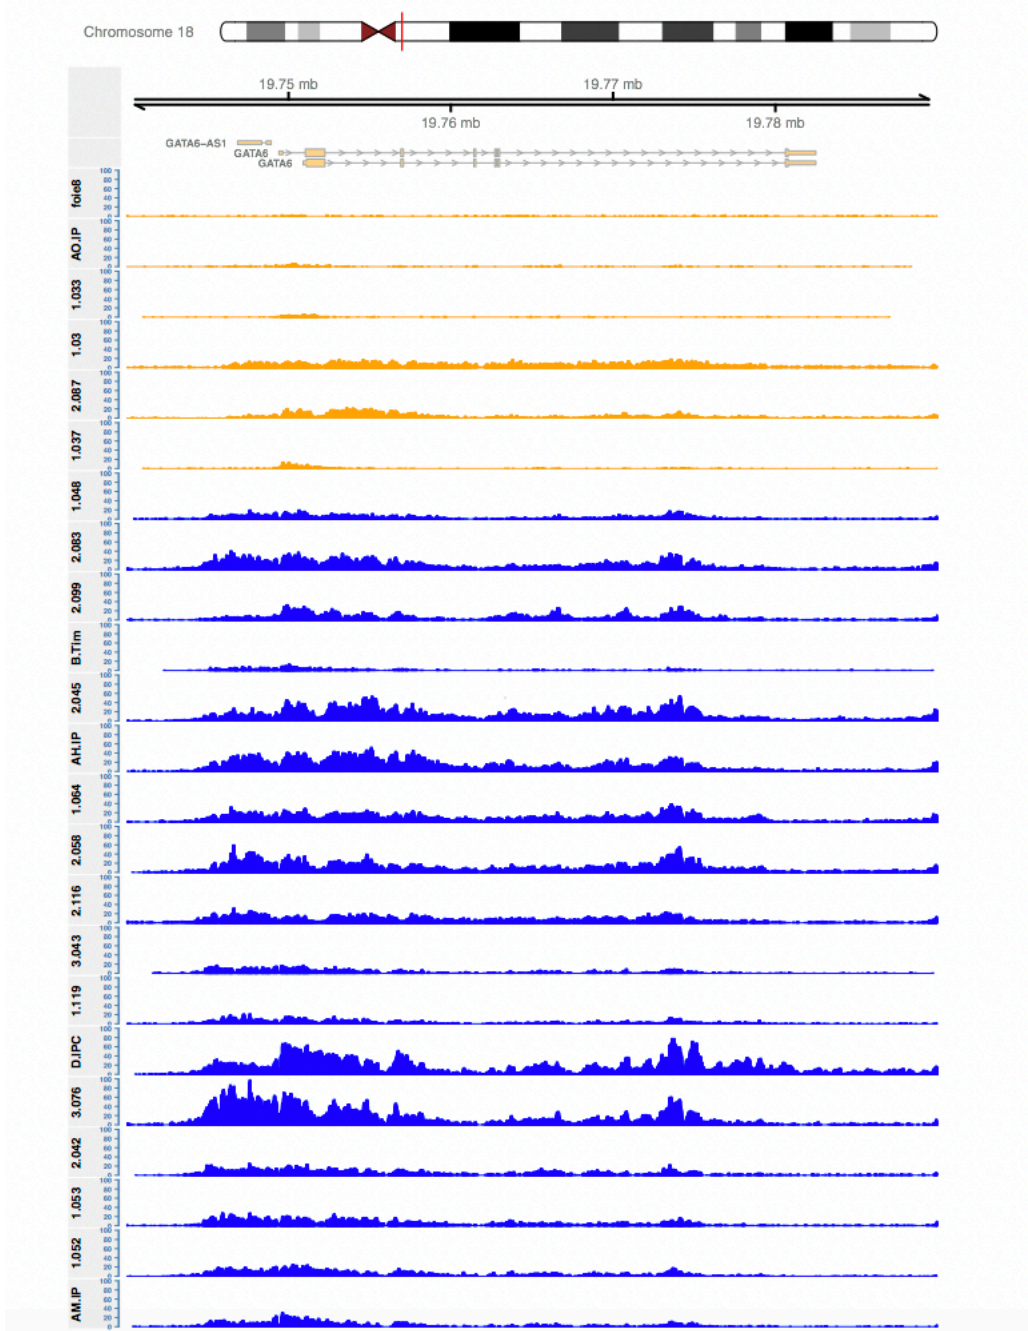

Supplementary Figure 8. GATA6 super-enhancer peak visualization for each sample.

## GATA6 putative targets

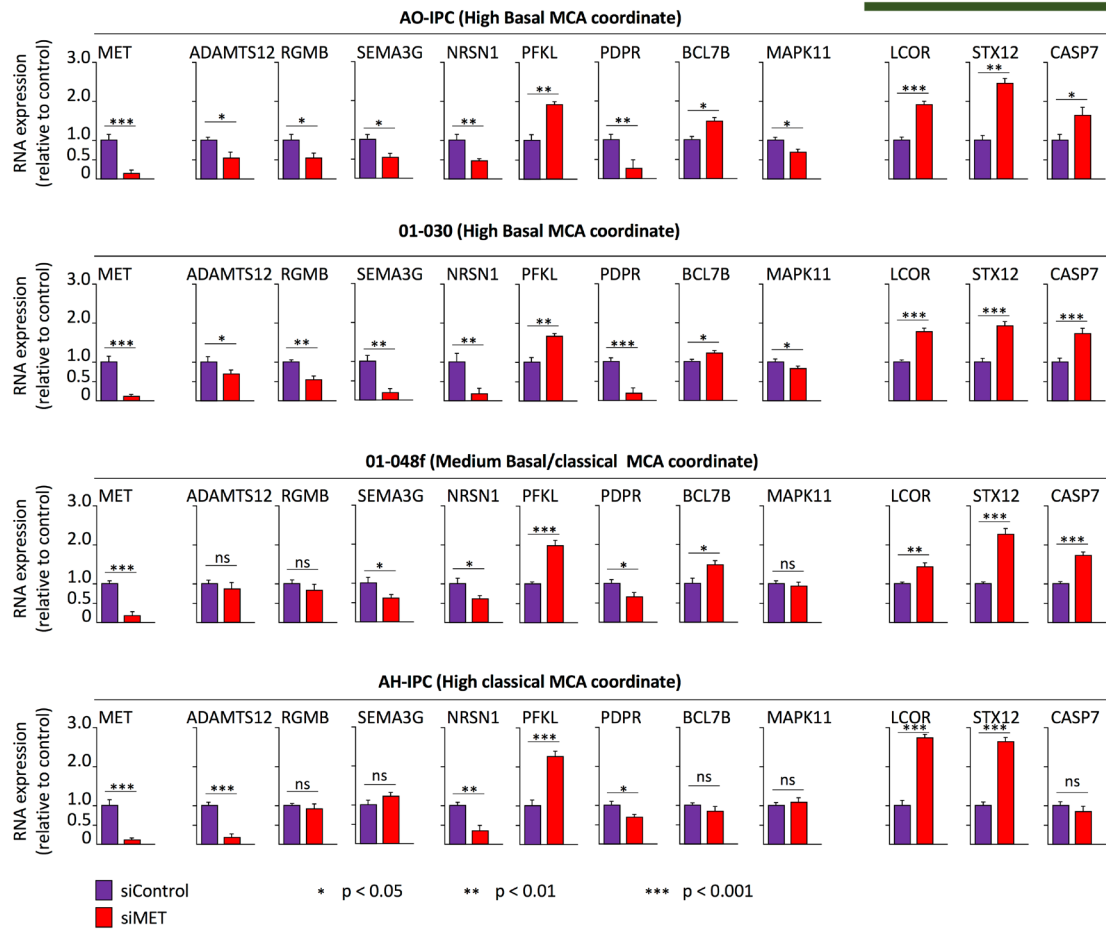

**Supplementary Figure 9. qPCR validations on relevant biological markers.** Error bars represent  $\pm$  standard deviation. P-values as indicated on the figure were calculated by the Mann-Whitney two-tailed Test.

**Supplementary Table 1: Clinical characteristics of the 24 PDTXs**

| ID.Consortium | Biomaterial.Collection.method | Age | Sex | Diagnosis                 | Diagnosis.Metastasis.Liver | Histology.Grade | TNM.Stage | Tumor.Location | Surgery.First | OS.event | OS.delay |
|---------------|-------------------------------|-----|-----|---------------------------|----------------------------|-----------------|-----------|----------------|---------------|----------|----------|
| 1.03          | Biopsy                        | 66  | F   | Pancreatic Adenocarcinoma | 1                          | G1              | 4         | Pancreas       | N             | 1        | 2        |
| 1.033         | Biopsy                        | 56  | M   | Pancreatic Adenocarcinoma | 1                          | G3              | 4         | Pancreas       | N             | 1        | 3        |
| 1.037         | Biopsy                        | 58  | M   | Pancreatic Adenocarcinoma | 1                          | G1              | 4         | Pancreas       | N             | 1        | 8        |
| 1.037         | Biopsy                        | 58  | M   | Pancreatic Adenocarcinoma | 1                          | G1              | 4         | Pancreas       | N             | 1        | 8        |
| 1.048         | Biopsy                        | 64  | F   | Pancreatic Adenocarcinoma | 1                          | NA              | 4         | Pancreas       | N             | 1        | 18       |
| 1.052         | Biopsy                        | 46  | M   | Pancreatic Adenocarcinoma | NA                         | G2              | 4         | Pancreas       | N             | 1        | 14       |
| 1.053         | Surgery                       | 63  | M   | Pancreatic Adenocarcinoma | 0                          | G1              | 2b        | Pancreas       | Y             | 1        | 9        |
| 1.064         | Surgery                       | 67  | F   | Pancreatic Adenocarcinoma | 0                          | G2              | 2b        | Pancreas       | Y             | 0        | 28       |
| 1.119         | Surgery                       | 81  | M   | Pancreatic Adenocarcinoma | NA                         | G2              | 2b        | Pancreas       | Y             | 1        | 10       |
| 2.029         | Surgery                       | 68  | F   | Pancreatic Adenocarcinoma | 0                          | G2              | 2b        | Pancreas       | Y             | 0        | 39       |
| 2.042         | Surgery                       | 52  | M   | Pancreatic Adenocarcinoma | 0                          | G1              | 2b        | Pancreas       | Y             | 1        | 18       |
| 2.045         | Surgery                       | 79  | M   | Pancreatic Adenocarcinoma | 0                          | G1              | 2a        | Pancreas       | Y             | 1        | 12       |
| 2.058         | Biopsy                        | 78  | F   | Pancreatic Adenocarcinoma | 0                          | NA              | NA        | Pancreas       | N             | 1        | 10       |
| 2.083         | Biopsy                        | 74  | F   | Pancreatic Adenocarcinoma | 1                          | NA              | 4         | Pancreas       | N             | 1        | 6        |
| 2.087         | Biopsy                        | 57  | M   | Pancreatic Adenocarcinoma | NA                         | NA              | NA        | Pancreas       | N             | 1        | 12       |
| 2.099         | Surgery                       | 66  | F   | Pancreatic Adenocarcinoma | NA                         | G2              | 2b        | Pancreas       | Y             | 1        | 14       |
| 2.116         | Surgery                       | 69  | F   | Pancreatic Adenocarcinoma | 0                          | G1              | 4         | Pancreas       | Y             | 1        | 5        |
| 3.043         | Surgery                       | 59  | M   | Pancreatic Adenocarcinoma | 0                          | G1              | 2b        | Pancreas       | Y             | 1        | 10       |
| 3.076         | Biopsy                        | 61  | M   | Pancreatic Adenocarcinoma | 1                          | NA              | 4         | Pancreas       | N             | 1        | 6        |
| AH-IPC        | Surgery                       | 74  | M   | Pancreatic Adenocarcinoma | 0                          | G2/G3           | 2b        | Pancreas       | Y             | 1        | 11       |
| AM-IPC        | Surgery                       | 69  | M   | Pancreatic Adenocarcinoma | 0                          | G3              | 2b        | Pancreas       | Y             | 0        | 33       |
| AO-IPC        | Surgery                       | 63  | F   | Pancreatic Adenocarcinoma | 0                          | G2              | 2b        | Pancreas       | Y             | 1        | 6        |
| D-IPC         | Surgery                       | 50  | F   | Pancreatic Adenocarcinoma | 0                          | G2              | 2b        | Pancreas       | Y             | 1        | 29       |
| Foie8b        | Biopsy                        | 52  | F   | Pancreatic Adenocarcinoma | 1                          | NA              | 4         | Liver          | N             | 1        | 3        |

## Supplementary Table 2: Epigenetically deregulated pathways

|           | Top pathways                                           | P-val    | Genes                                                                                                                      |
|-----------|--------------------------------------------------------|----------|----------------------------------------------------------------------------------------------------------------------------|
| Cluster 1 | epithelial cell differentiation (GO:0030855)           | 1.09E-04 | YAP1;LAMA5;RXRA;MREG;HEY1;ITGA2;MYO5A;NF2;STK4;RHCG;E2F7                                                                   |
|           | regulation of cell division (GO:0051302)               | 3.02E-04 | IL1A;PRKAR1A;IL1B;MYC;TGFA;RCC1;SFN;PGF;E2F7                                                                               |
|           | regulation of apoptotic signaling pathway (GO:2001233) | 4.34E-04 | YAP1;MLLT11;IL1A;NRP1;KDM1A;IL1B;PMAIP1;SFN;STK4;S100A9;CD44                                                               |
|           | Hippo signaling pathway (hsa04390)                     | 5.11E-04 | YAP1;PPP2CA;WWTR1;MYC;WNT7B;FZD6;NF2                                                                                       |
|           | TGF-beta signaling pathway (hsa04350)                  | 7.27E-03 | PPP2CA;SMURF2;MYC;FST                                                                                                      |
|           | Wnt signaling pathway (hsa04310)                       | 9.72E-03 | MYC;SERPINF1;WNT7B;RUVBL1;FZD6                                                                                             |
|           | PI3K-Akt signaling pathway (hsa04151)                  | 1.31E-02 | PPP2CA;LAMA5;RXRA;MYC;ITGA2;MET;EGFR;PGF                                                                                   |
|           | ErbB signaling pathway (hsa04012)                      | 4.51E-02 | MYC;TGFA;EGFR                                                                                                              |
| Cluster 2 | positive regulation of insulin secretion (GO:0032024)  | 2.86E-06 | PFKFB2;TCF7L2;CASR;RBP4;PDX1;ARRB1;MCU                                                                                     |
|           | lipid biosynthetic process (GO:0008610)                | 1.15E-05 | ACHE;ACSS2;PGAP3;SRD5A3;MGST2;PLA2G4A;ACSL5;TFPC2L1;PRLR;PRKAB1;CYP27A1;HSD11B2;HSD17B2;PLBD1;PIPSK1B;ANG;DEGS2;MPPE1;MGLL |
|           | glandular epithelial cell differentiation (GO:0002067) | 9.27E-05 | BMP2;GATA6;PDX1;SPDEF                                                                                                      |
|           | Maturity onset diabetes of the young (hsa04950)        | 3.88E-03 | NR5A2;HNF4A;PDX1                                                                                                           |
|           | Insulin secretion (hsa04911)                           | 3.99E-03 | PLCB4;CREB3L1;PDX1;ATP1B1;ADCY6                                                                                            |
|           | Steroid hormone biosynthesis (hsa00140)                | 5.64E-03 | HSD11B2;SRD5A3;HSD17B2;CYP3A5                                                                                              |
|           | Gastric acid secretion (hsa04971)                      | 1.31E-02 | PLCB4;KCNK10;ATP1B1;ADCY6                                                                                                  |
|           | Hedgehog signaling pathway (hsa04340)                  | 2.36E-02 | BMP2;SHH;IHH                                                                                                               |
| Cluster 3 | Maturity onset diabetes of the young (hsa04950)        | 4.26E-04 | HNF1B;HNF1A;FOXA3                                                                                                          |
|           | hexose metabolic process (GO:0019318)                  | 7.13E-04 | HKDC1;LRP5;FUT2;FBP1;FUT4;ATF3                                                                                             |
|           | endocrine pancreas development (GO:0031018)            | 1.42E-03 | ONECUT2;HNF1B;FOXA3                                                                                                        |
|           | Steroid biosynthesis (hsa00100)                        | 5.72E-03 | CYP51A1;FDFT1                                                                                                              |
|           | Ras signaling pathway (hsa04014)                       | 9.74E-03 | EFNA1;PLA2G4F;KITLG;EFNA2;RASA3                                                                                            |
|           | Fructose and mannose metabolism (hsa00051)             | 1.43E-02 | HKDC1;FBP1                                                                                                                 |
|           | Axon guidance (hsa04360)                               | 3.61E-02 | EFNA1;EFNA2;SEMA4G                                                                                                         |

**Supplementary Table 3: Differentially expressed genes (DEG) between basal siMET and siControl (scrambled siRNA) samples**

| geneSIGN         | p-value  | t          |
|------------------|----------|------------|
| RP11-1L12.3      | 1.95E-06 | -41.860798 |
| RP1-239B22.5     | 1.54E-03 | 7.69154    |
| RGMB             | 2.00E-03 | 7.169738   |
| TPM4             | 2.12E-03 | -7.062344  |
| HSDL2            | 2.28E-03 | -6.930092  |
| IFT43            | 3.68E-03 | -6.089852  |
| GANAB            | 3.81E-03 | -6.031596  |
| BICD2            | 4.08E-03 | -5.919077  |
| ZSCAN21          | 4.48E-03 | 5.7694     |
| MET              | 5.78E-03 | 5.378017   |
| LCOR             | 5.83E-03 | -5.363568  |
| COMMD1           | 6.44E-03 | 5.217584   |
| GS1-44D20.1      | 7.30E-03 | -5.035843  |
| KLHDC3           | 8.49E-03 | -4.824697  |
| RMND5A           | 9.05E-03 | 4.737616   |
| ASB3             | 1.01E-02 | 4.591216   |
| HESX1            | 1.06E-02 | -4.527169  |
| RPS-1057J7.6     | 1.06E-02 | 4.521886   |
| JPX              | 1.23E-02 | -4.331092  |
| ZNF551           | 1.24E-02 | -4.321959  |
| ZNF766           | 1.26E-02 | -4.305729  |
| AC120194.1       | 1.35E-02 | 4.215367   |
| EFA1             | 1.38E-02 | -4.192762  |
| MTFR1L           | 1.48E-02 | 4.105075   |
| PREPL            | 1.49E-02 | 4.096972   |
| GPR75-ASB3       | 1.55E-02 | 4.049169   |
| HCP5             | 1.62E-02 | 3.993808   |
| STX12            | 1.63E-02 | -3.988203  |
| RP11-219B4.5     | 1.73E-02 | 3.915472   |
| BAP1             | 1.80E-02 | 3.872624   |
| IGIP             | 1.82E-02 | 3.855173   |
| C9orf91          | 1.97E-02 | 3.766235   |
| RP1-1J6.2        | 2.00E-02 | -3.748437  |
| FAM169A          | 2.03E-02 | 3.728222   |
| SLC3A1           | 2.06E-02 | 3.712597   |
| BTBD9            | 2.19E-02 | 3.642984   |
| AC006449.1       | 2.20E-02 | 3.637264   |
| EMC6             | 2.45E-02 | -3.51562   |
| C5orf55          | 2.53E-02 | -3.481552  |
| IL11RA           | 2.54E-02 | 3.476316   |
| RPS4XP8          | 2.55E-02 | 3.475708   |
| GPR83            | 2.64E-02 | 3.436849   |
| ZNF605           | 2.71E-02 | -3.408364  |
| PRKAB1           | 2.82E-02 | 3.364183   |
| SPSB3            | 2.83E-02 | 3.358656   |
| FOXP4            | 2.85E-02 | -3.353784  |
| ANKRD52          | 2.97E-02 | 3.310073   |
| TNFRSF21         | 3.25E-02 | 3.214313   |
| AC004490.1       | 3.43E-02 | -3.155078  |
| PRDX4            | 3.44E-02 | -3.154749  |
| ARL5B            | 3.49E-02 | 3.139711   |
| OSGIN1           | 3.56E-02 | 3.118922   |
| TRAM1            | 3.58E-02 | 3.111726   |
| AL391152.1       | 3.63E-02 | -3.096749  |
| RP1-317E23.7     | 3.65E-02 | 3.091424   |
| NCR3LG1          | 3.74E-02 | 3.068206   |
| RP1-317E23.6     | 3.78E-02 | 3.055373   |
| MTSS1L           | 3.83E-02 | -3.041741  |
| PHACTR2          | 3.90E-02 | -3.024249  |
| PANK1            | 4.01E-02 | -2.995802  |
| AC133528.2       | 4.02E-02 | -2.994419  |
| RNF149           | 4.15E-02 | 2.962147   |
| AC068580.7       | 4.21E-02 | 2.947394   |
| DTTL             | 4.24E-02 | 2.939998   |
| ZNF267           | 4.38E-02 | -2.907419  |
| SNX13            | 4.43E-02 | 2.89497    |
| FLJ00418         | 4.49E-02 | -2.882334  |
| IGBP1-AS2        | 4.53E-02 | 2.87359    |
| PBDC1            | 4.57E-02 | -2.864794  |
| MAP3K2           | 4.78E-02 | -2.821405  |
| RP11-485G4.2     | 4.88E-02 | -2.800172  |
| GRB10            | 4.89E-02 | -2.797609  |
| RPS23P8          | 4.94E-02 | 2.788195   |
| RP11-697E22.1    | 1.39E-01 | 3.012046   |
| RP11-841O20.2    | 2.19E-01 | -3.802259  |
| RP11-140K17.3    | 3.15E-01 | -4.121427  |
| RP11-101E13.5    | 5.42E-01 | 2.945923   |
| bac-BPG157A10.21 | 3.34E-02 | 3.185579   |

**Supplementary Table 4: Primer sequences for qPCR validation**

| <b>Supplementary Table 4: Primer sequences for qPCR validation</b> |                                   |                                   |                      |
|--------------------------------------------------------------------|-----------------------------------|-----------------------------------|----------------------|
|                                                                    | <b>Forward Primer (5'-&gt;3')</b> | <b>Reverse Primer (5'-&gt;3')</b> | <b>amplicon size</b> |
| <b>MET</b>                                                         | AGCAATGGGGAGTGTAAGAGG             | CCCAGTCTTGTA CT CAGCAAC           | 198                  |
| <b>RGMB</b>                                                        | TGTTGGGTATCAGTGACCTCA             | CTTCGGGGTTGGTAGAGGATG             | 75                   |
| <b>STX12</b>                                                       | TGCAACAGTTACAACACTCCAC            | GGCAAGGACCCTAATTCTTCAG            | 76                   |
| <b>LCOR</b>                                                        | CTTCGGAGTGGTGATGGGGTA             | GTGGAAC TTTGAGTGATGTGGA           | 88                   |
| <b>PFKL</b>                                                        | GTACCTGGCGCTGGTATCTG              | CCTCTCACACATGAAGTTCTCC            | 100                  |
| <b>PDPR</b>                                                        | TGCTGTGATTGTTGGAAGAC              | CACAGAAGTGCCCGTGATTC              | 155                  |
| <b>SEMA3G</b>                                                      | CGGGTGCTGGTGAACAAATG              | CTCTAGCTGGTCAAAGTGGGT             | 99                   |
| <b>NRSN1</b>                                                       | TTTTGTGATCCTCGGATTGACTG           | CAGAGCACTGT TAAACTGGACA           | 124                  |
| <b>CASP7</b>                                                       | AGGGACCGAGCTTGATGATG              | CACTGGGATCTTGTATCGAGGA            | 85                   |
| <b>BCL7B</b>                                                       | TCCCTGAGGATATTTAAGTGGGT           | CTCGGGCTGCTGAACTGTT               | 82                   |
| <b>ADAMTS12</b>                                                    | ACTTTGGGGCGCTTTGCTAT              | GCAGGCCCTTGATAAAATGCT             | 90                   |
| <b>MAPK11</b>                                                      | AAGCACGAGAACGTCATCGG              | TCACCAAGTACACTTCGCTGA             | 82                   |
