# Supplementary material for: Distinct epigenetic landscapes underlie the pathobiology of pancreatic cancer subtypes
Source: PubMed Central journal article supplement (PMC5958058; doi:10.1038/s41467-018-04383-6), 2018-05-17
Supplement: 41467_2018_4383_MOESM3_ESM.pdf [file 41467_2018_4383_MOESM3_ESM.pdf]

## Description of Additional Supplementary Files

File Name: Supplementary Data 1

Description: Excel workbook listing the GSEA enriched pathways identified for each chromatin state (E1-E15) in separate spreadsheets. Gene score used in fgsea was the frequency among all samples of the presence of a particular chromatin state within -20kb from TSS +1kb from TSE of the gene. Leading edges correspond to genes that drive the enrichment as given by fgsea.

File Name: Supplementary Data 2

Description: Excel spreadsheet listing the GSEA enriched pathways for the siMET condition. Enrichment tests were performed based on P-values of the differential RNA-seq analysis of basal siMET vs. basal control samples.
